# Supplementary material for: Orai, STIM, and PMCA contribute to reduced calcium signal generation in CD8+ T cells of elderly mice
Source: PubMed Central journal article supplement (PMC7066920; doi:10.18632/aging.102809), 2020-02-12
Supplement: aging-12-102809-s001..pdf [file aging-12-102809-s001..pdf]

## SUPPLEMENTARY TABLES

**Supplementary Table 1. Quantification of Ca<sup>2+</sup> signal parameters (ratio 340/380 ± SEM) for combined Ca<sup>2+</sup> measurements with 0.5 mM Ca<sup>2+</sup> in the external solution as shown in Figures 1A, 3A and Supplementary Figure 5A, 5G.**

|                      | <b>Basal Ca<sup>2+</sup></b> | <b>Influx Peak</b> | <b>Ca<sup>2+</sup> Plateau</b> | <b>Influx Rate</b> |
|----------------------|------------------------------|--------------------|--------------------------------|--------------------|
| <b>adult</b>         | 0.41572                      | 3.35034            | 2.86868                        | 0.01493            |
| <b>untouched</b>     | (± 0.00724)                  | (± 0.06840)        | (± 0.11545)                    | (± 0.00325)        |
| <b>elderly</b>       | 0.43849                      | 2.74772            | 2.29437                        | 0.00943            |
| <b>untouched</b>     | (± 0.00963)                  | (± 0.16623)        | (± 0.17377)                    | (± 0.00138)        |
| <b>adult</b>         | 0.44257                      | 1.58579            | 1.32114                        | 0.00618            |
| <b>stimulated</b>    | (± 0.00828)                  | (± 0.08134)        | (± 0.06486)                    | (± 0.00135)        |
| <b>elderly</b>       | 0.45081                      | 1.22973            | 0.99628                        | 0.00411            |
| <b>stimulated</b>    | (± 0.00674)                  | (± 0.11855)        | (± 0.10602)                    | (± 0.00030)        |
| <b>norm. adult</b>   | 1                            | 1                  | 1                              | 1                  |
| <b>sorted CM/EM</b>  |                              |                    |                                |                    |
| <b>norm. elderly</b> | 1.00521                      | 0.76461            | 0.76402                        | 0.66231            |
| <b>sorted CM</b>     | (± 0.01682)                  | (± 0.04269)        | (± 0.03756)                    | (± 0.06913)        |
| <b>norm. elderly</b> | 0.97606                      | 0.89495            | 0.90768                        | 0.77298            |
| <b>sorted EM</b>     | (± 0.00743)                  | (± 0.04126)        | (± 0.03429)                    | (± 0.09990)        |

**Supplementary Table 2. Quantification of Ca<sup>2+</sup> signal parameters (ratio 340/380 ± SEM) for re-addition measurements with 0.5 mM Ca<sup>2+</sup> in the external solution as shown in Figures 1B, 3B and Supplementary Figure 5B, 5H.**

|                      | <b>Basal Ca<sup>2+</sup></b> | <b>TG Peak</b> | <b>Influx Peak</b> | <b>Ca<sup>2+</sup> Plateau</b> | <b>Influx Rate</b> |
|----------------------|------------------------------|----------------|--------------------|--------------------------------|--------------------|
| <b>adult</b>         | 0.40805                      | 0.54841        | 3.44848            | 2.71912                        | 0.04126            |
| <b>untouched</b>     | (± 0.00360)                  | (± 0.01312)    | (± 0.12020)        | (± 0.09117)                    | (± 0.00299)        |
| <b>elderly</b>       | 0.43947                      | 0.69555        | 2.6784             | 2.08323                        | 0.02871            |
| <b>untouched</b>     | (± 0.01381)                  | (± 0.08362)    | (± 0.08594)        | (± 0.06764)                    | (± 0.00205)        |
| <b>adult</b>         | 0.49956                      | 0.55749        | 1.73206            | 1.26592                        | 0.01808            |
| <b>stimulated</b>    | (± 0.02458)                  | (± 0.01406)    | (± 0.08618)        | (± 0.08696)                    | (± 0.00189)        |
| <b>elderly</b>       | 0.46913                      | 0.62148        | 1.34722            | 0.92057                        | 0.01210            |
| <b>stimulated</b>    | (± 0.01081)                  | (± 0.03382)    | (± 0.06802)        | (± 0.05860)                    | (± 0.00064)        |
| <b>norm. adult</b>   | 1                            | 1              | 1                  | 1                              | 1                  |
| <b>sorted CM/EM</b>  |                              |                |                    |                                |                    |
| <b>norm. elderly</b> | 0.99123                      | 1.03256        | 0.80305            | 0.77923                        | 0.81061            |
| <b>sorted CM</b>     | (± 0.01456)                  | (± 0.01979)    | (± 0.03007)        | (± 0.03169)                    | (± 0.09589)        |
| <b>norm. elderly</b> | 0.99405                      | 1.02691        | 0.91613            | 0.91261                        | 0.95864            |
| <b>sorted EM</b>     | (± 0.01283)                  | (± 0.04218)    | (± 0.02254)        | (± 0.01533)                    | (± 0.04460)        |

**Supplementary Table 3. Quantification of Ca<sup>2+</sup> signal parameters (ratio 340/380 ± SEM) of combined Ca<sup>2+</sup> measurements with 2 mM Ca<sup>2+</sup> in the external solution as shown in Supplementary Figures 2A, 3A.**

|                           | Basal Ca <sup>2+</sup> | Influx Peak            | Ca <sup>2+</sup> Plateau | Influx Rate            |
|---------------------------|------------------------|------------------------|--------------------------|------------------------|
| <b>adult untouched</b>    | 0.44246<br>(± 0.01405) | 3.67726<br>(± 0.07794) | 3.37786<br>(± 0.07495)   | 0.01558<br>(± 0.00312) |
| <b>elderly untouched</b>  | 0.45475<br>(± 0.01841) | 3.18998<br>(± 0.08738) | 2.77220<br>(± 0.07289)   | 0.01403<br>(± 0.00602) |
| <b>adult stimulated</b>   | 0.48054<br>(± 0.00932) | 2.32779<br>(± 0.20696) | 2.09853<br>(± 0.18375)   | 0.00757<br>(± 0.00214) |
| <b>elderly stimulated</b> | 0.49030<br>(± 0.01157) | 2.09466<br>(± 0.15442) | 1.80740<br>(± 0.14058)   | 0.00651<br>(± 0.00109) |

**Supplementary Table 4. Quantification of Ca<sup>2+</sup> signal parameters (ratio 340/380 ± SEM) for re-addition measurements with 2 mM Ca<sup>2+</sup> in the external solution as shown in Supplementary Figures 2D, 3D.**

|                           | Basal Ca <sup>2+</sup> | TG Peak                | Influx Peak            | Ca <sup>2+</sup> Plateau | Influx Rate            |
|---------------------------|------------------------|------------------------|------------------------|--------------------------|------------------------|
| <b>adult untouched</b>    | 0.44743<br>(± 0.01368) | 0.52506<br>(± 0.01526) | 3.87886<br>(± 0.10149) | 3.12665<br>(± 0.11758)   | 0.03775<br>(± 0.00362) |
| <b>elderly untouched</b>  | 0.44508<br>(± 0.00836) | 0.62696<br>(± 0.07810) | 3.40563<br>(± 0.14274) | 2.68961<br>(± 0.08306)   | 0.02863<br>(± 0.00161) |
| <b>adult stimulated</b>   | 0.49982<br>(± 0.01600) | 0.55386<br>(± 0.00431) | 2.53691<br>(± 0.17716) | 2.06464<br>(± 0.15648)   | 0.01970<br>(± 0.00080) |
| <b>elderly stimulated</b> | 0.51258<br>(± 0.01150) | 0.64717<br>(± 0.03941) | 2.22903<br>(± 0.09299) | 1.70259<br>(± 0.07201)   | 0.01882<br>(± 0.00072) |

**Supplementary Table 5. Quantification of rate constant (*k*), calculated as 1/tau (sec<sup>-1</sup> ± SEM), extract from global Ca<sup>2+</sup> measurements with 0.5 mM [Ca<sup>2+</sup>]<sub>ext</sub> for untouched and stimulated CD8<sup>+</sup> T cells isolated from adult and elderly mice as shown in Figure 6B, 6E.**

| [Ca <sup>2+</sup> ] <sub>int</sub> | untouched               |       |                         |       | stimulated              |       |                        |       |
|------------------------------------|-------------------------|-------|-------------------------|-------|-------------------------|-------|------------------------|-------|
|                                    | adult                   |       | elderly                 |       | adult                   |       | elderly                |       |
|                                    | mean                    | cells | mean                    | cells | mean                    | cells | mean                   | cells |
| <b>0-0.5</b>                       | -                       | -     | -                       | -     | 0.02306<br>(± 0.00241)  | 18    | 0.03365<br>(± 0.00406) | 59    |
| <b>0.5-1</b>                       | 0.04083<br>(± 0.00551)  | 40    | 0.053413<br>(± 0.00361) | 88    | 0.03919<br>(± 0.00066)  | 963   | 0.04978<br>(± 0.00091) | 947   |
| <b>1-1.5</b>                       | 0.048453<br>(± 0.00552) | 35    | 0.060124<br>(± 0.00387) | 74    | 0.048255<br>(± 0.00103) | 468   | 0.06430<br>(± 0.00207) | 295   |
| <b>1.5-2</b>                       | 0.05410<br>(± 0.0050)   | 60    | 0.05795<br>(± 0.00384)  | 128   | 0.05175<br>(± 0.00129)  | 262   | 0.06784<br>(± 0.00418) | 118   |
| <b>2-2.5</b>                       | 0.05111<br>(± 0.00324)  | 383   | 0.06567<br>(± 0.00284)  | 247   | 0.06127<br>(± 0.00136)  | 333   | 0.0744<br>(± 0.00477)  | 56    |
| <b>2.5-3</b>                       | 0.05461<br>(± 0.00094)  | 627   | 0.07003<br>(± 0.00284)  | 101   | -                       | -     | -                      | -     |
| <b>3-3.5</b>                       | 0.05139<br>(± 0.00054)  | 145   | 0.05901<br>(± 0.00284)  | 26    | -                       | -     | -                      | -     |
